Launey Y, Lakhal K, Rozec B, Mallédant Y, Sébille V, Jaber S, Le Thuaut A, Feuillet F, Cinotti R; ATLANREA group: Extubation success prediction in a multicentric cohort of patients with severe brain injury. *ANESTHESIOLOGY* 2017; 127:338–46

2. Ko R, Ramos L, Chalela JA: Conventional weaning parameters do not predict extubation failure in neurocritical care patients. *Neurocrit Care* 2009; 10:269–73
3. Godet T, Chabanne R, Marin J, Kauffmann S, Futier E, Pereira B, Constantin JM: Extubation failure in brain-injured patients: Risk factors and development of a prediction score in a preliminary prospective cohort study. *ANESTHESIOLOGY* 2017; 126:104–14
4. Yang KL, Tobin MJ: A prospective study of indexes predicting the outcome of trials of weaning from mechanical ventilation. *N Engl J Med* 1991; 324:1445–50
5. Rishi MA, Kashyap R, Wilson G, Schenck L, Hocker S: Association of extubation failure and functional outcomes in patients with acute neurologic illness. *Neurocrit Care* 2016; 24:217–25

(Accepted for publication December 7, 2017.)

#### *In Reply:*

We gratefully acknowledge Dr. Patlak *et al.* for his constructive comments on our article.<sup>1</sup> We fully agree with our colleague when he states that protracted ventilation is the main issue in brain-injured patients,<sup>2</sup> because delaying extubation promotes morbidity and healthcare costs. The VISAGE (visual pursuit, swallowing, age, Glasgow coma scale for extubation) score<sup>1</sup> was developed to help the physician in securing the challenging extubation process in neurocritical care patients. The fear of extubation failure is due to the lack of guidelines for extubation in neurologic patients, and there is a clear need for new clinical evidence to help the attending physician. If the VISAGE score performs well at predicting extubation success based on favorable neurologic clinical signs, it is true that its performance is less accurate in patients with a low score. One obvious explanation stems from the fact that neurologic examination varies considerably within the same day in a single patient. Thus, the VISAGE score, as well as the other prediction score recently published in *ANESTHESIOLOGY*,<sup>3</sup> add a lot to the field by showing for the first time that a suboptimal level of consciousness and one or

two functional aspects of the airway may predict a successful extubation. However, as mentioned by Patlak *et al.*, we need other information for guiding extubation when the value of the VISAGE score is low. Finally, we truly believe that this score is a first step toward improvement of global respiratory management of neurocritical care patients.<sup>4</sup> Even if it is likely that extubation failure rate, as well as delayed extubation, will remain elevated in these patients over the next few years, this should not be considered a fatal flaw.

#### Competing Interests

The authors declare no competing interests.

**Raphaël Cinotti, M.D., Ph.D., Antoine Roquilly, M.D., Ph.D., Karim Asehnoune, M.D., Ph.D.** University Hospital of Nantes, Nantes, France (K.A.). karim.asehnoune@chu-nantes.fr

#### References

1. Asehnoune K, Seguin P, Lasocki S, Roquilly A, Delater A, Gros A, Denou F, Mahé PJ, Nessler N, Demeure-Dit-Latte D, Launey Y, Lakhal K, Rozec B, Mallédant Y, Sébille V, Jaber S, Le Thuaut A, Feuillet F, Cinotti R; ATLANREA Group: Extubation success prediction in a multicentric cohort of patients with severe brain injury. *ANESTHESIOLOGY* 2017; 127:338–46
2. Coplin WM, Pierson DJ, Cooley KD, Newell DW, Rubenfeld GD: Implications of extubation delay in brain-injured patients meeting standard weaning criteria. *Am J Respir Crit Care Med* 2000; 161:1530–6
3. Godet T, Chabanne R, Marin J, Kauffmann S, Futier E, Pereira B, Constantin JM: Extubation failure in brain-injured patients: Risk factors and development of a prediction score in a preliminary prospective cohort study. *ANESTHESIOLOGY* 2017; 126:104–14
4. The BI-VILI Study Group, Asehnoune K, Mrozek S, Perrigault P-F, Seguin P, Dahyot-Fizelier C, Lasocki S, Pujol A, Martin M, Chabanne R, Muller L, Hanouz J-L, Hammad E, Rozec B, Kerforne T, Ichai C, Cinotti R, Geeraerts T, Elaroussi D, Pelosi P, Jaber S, Dalichampt M, Feuillet F, Sébille V, Roquilly A: A multi-faceted strategy to reduce ventilation-associated mortality in brain-injured patients. The BI-VILI project: A nationwide quality improvement project. *Intensive Care Medicine* 2017; 287:345–14

(Accepted for publication December 7, 2017.)
